# Supplementary material for: Morphology of the Asterion: A Systematic Review and Meta-analysis
Source: Research Square preprint supplement (doi:10.21203/rs.3.rs-8817841/v1), 2026-02-23
Supplement: Supplementary file 1 [file 9112702175532b1872d440e8.docx]

| **Domain one: Selection** | | |
| --- | --- | --- |
| **Item number** | **Item** | **Assessment criteria** |
| 1 | Representativeness of specimens | **High quality:** Adult skull/cadavers or imaging data representative of the targer population with clearly described source  **Moderate quality:** single –center or convenience sample  **Low quality:** highly selected or biased sample  **Unclear:** No description of specimen source. |
| 2 | Sample size | **High quality:** Sample size adequate or justified for morphological description.  **Moderate quality:** Sample size reported but not justified.  **Low quality:** Very small sample without justification.  **Unclear:** Sample size not clearly reported. |
| 3 | Missing data/specimen integrity | **High quality:** Complete specimens analyzed; exclusions clearly reported.  **Moderate quality:** Minor exclusions with limited explanation.  **Low quality:** Significant missing or damaged specimens not addressed.  **Unclear:** No information on exclusions or missing data. |
| **Domain Two: Comparability of groups** | | |
| 4 | Comparability of groups | **Not applicable (NA)** for purely descriptive studies.  **High quality (if applicable):** Formal comparison of right vs left sides or sex or population with appropriate statistical analysis.  **Low quality:** Comparisons reported without appropriate analysis or adjustment. |
| **Domain three: Outcome** | | |
| 5 | Ascertainment of outcome* | **High quality:** Asterion type defined using a recognized classification system with clear anatomical landmarks.  **Low quality:** Non-standard or unclear definitions.  **Unclear:** No definition provided. |
| 6 | Statistical analysis* | **High quality:** Appropriate descriptive and/or comparative statistical analysis clearly described.  **Low quality:** Inappropriate or poorly described analysis.  **Unclear:** Statistical methods not reported. |
| Overall rating | | New classification: two key items: **5.** ascertainment of outcome and **6.** statistical tests  High quality: Items 5 or 6 rated high, few other items rated moderate, no item rated low |
| Moderate quality: items 5 or 6 rated moderate, and none rated low judgement based on the other item ratings |
| Low quality:when 1 + item is rated low |
| Unclear quality: items 5 or 6 rated unclear, and none rated low2 + items rated unclear, and none rated low |
