# Supplementary material for: Morphology of the Asterion: A Systematic Review and Meta-analysis
Source: Research Square preprint supplement (doi:10.21203/rs.3.rs-8817841/v1), 2026-02-23
Supplement: Supplementary file 2 [file a20e7396a862822f3e5dcf58.docx]

**Identification of studies via databases and registers**

Records identified from*: Databases (n =975)

PubMed (46), PubMed Centeral(164), Scopus(142), Science Direct(423), Google Scholar(200)

Records removed *before screening*:

Duplicate records removed (n = 175)

**Identification**

Records screened

(n = 800)

Records excluded**

(n =759)

Reports sought for retrieval

(n =41)

Reports not retrieved

(n =5)

**Screening**

Reports excluded n=23

Different Asterion categorization (n =1)

Unclear denominator (n= 5)

Unclear SD (n = 2)

Wrong outcome (n= 15)

Reports assessed for eligibility

(n =36)

Studies included in review

(n =13)

Reports of included studies

(n = skulls, asterions )

**Included**

Source: Page MJ, et al. BMJ 2021;372:n71. doi: 10.1136/bmj.n71.

This work is licensed under CC BY 4.0. To view a copy of this license, visit <https://creativecommons.org/licenses/by/4.0/>
