# Supplementary material for: Morphology of the Asterion: A Systematic Review and Meta-analysis
Source: Research Square preprint supplement (doi:10.21203/rs.3.rs-8817841/v1), 2026-02-23
Supplement: Supplementary file 3 [file e6e3f20ff46d3124f1806e85.docx]

**PubMed** ("asterion"[Title/Abstract] OR "asterionic point"[Title/Abstract] OR "craniometrics point"[Title/Abstract]) AND (morphology[Title/Abstract] OR morphometry[Title/Abstract] OR measurement[Title/Abstract] OR anatomy[Title/Abstract] OR variation [Title/Abstract]) AND (skull[Title/Abstract] OR cranium[Title/Abstract] OR cadaver [Title/Abstract] OR imaging [Title/Abstract] OR CT[Title/Abstract] OR "computed tomography"[Title/Abstract]), the search yield 46 articles.

**PubMed Central(PMC)** we used (asterion) AND (morphometry OR morphology OR measurement) AND (cadaver OR CT) which yield 164 studies.

**Google Scholars,** we searched the term “Asterion morphometry or morphology skull,” which yielded more than 1200 articles, from which we took the first 200 articles after applying sorting by relevance.

**Scopus**; TITLE-ABS-KEY (asterion OR "asterionic point" OR "craniometric point") AND TITLE-ABS-KEY (morphometry OR morphology OR measurement OR anatomy OR variation) AND TITLE-ABS-KEY (skull OR cranium OR cadaver OR imaging OR CT OR "computed tomography"), we obtained 142 articles from the search.

**Science Direct,** we used ("asterion" OR "asterial point") AND ("morphometry" OR "morphology" OR "measurement" OR "distance") AND ("skull" OR "cranial" OR "craniometric") with a search result of 392 studies.
